# Supplementary material for: Comparison of different microCT-based morphology assessment tools using human trabecular bone
Source: PubMed Central journal article supplement (PMC7235944; doi:10.1016/j.bonr.2020.100261), 2020-05-04
Supplement: mmc1.pdf [file mmc1.pdf]

Comparison of different microCT-based morphology assessment tools using human trabecular bone

---

|                           | <b>BoneJ</b>                                                                            | <b>Bruker</b>                                                                                     | <b>medtool</b>       | <b>Scanco</b>                                                                                                                                  |
|---------------------------|-----------------------------------------------------------------------------------------|---------------------------------------------------------------------------------------------------|----------------------|------------------------------------------------------------------------------------------------------------------------------------------------|
| <i>BV/TV</i>              | Algorithm: Voxel                                                                        | -                                                                                                 | -                    | Voxel                                                                                                                                          |
| <i>BS</i>                 | Resampling: 1                                                                           | -                                                                                                 | Surface: vxi_mi      | ip_sigma: 0.0<br>ip_support: 0<br>ip_threshold: 50<br>nr_ave_iter: 2<br>t_dir_radius: 2<br>size_image: 512<br>scale_image: 0.7<br>edges: false |
| <i>Tb.Th./<br/>Tb.Sp.</i> | -                                                                                       | -                                                                                                 | -                    | peel_iter: -1<br>roi_radius_factor: 10000<br>ridge_epsilon: 0.9<br>assign_epsilon: 1.8                                                         |
| <i>DA</i>                 | Automode<br>Vectors: 50000<br>Min spheres: 100<br>Max spheres: 2000<br>Tolerance: 0.005 | Adaptive spacing: 200<br>Number of orientations: 128<br>restrict thickness calculation within VOI | Normalization: trace | ip_sigma: 0.0<br>ip_support: 0<br>ip_threshold: 50<br>nr_ave_iter: 2<br>t_dir_radius: 2<br>size_image: 512<br>scale_image: 0.7<br>edges: false |

Supplementary Table 1: Parameter settings as used in the study. No data is given if no options were available.
